# Supplementary material for: Sex and nest type influence avian blood parasite prevalence in a high-elevation bird community
Source: PubMed Central journal article supplement (PMC7938522; doi:10.1186/s13071-021-04612-w), 2021-03-08
Supplement: 13071_2021_4612_MOESM1_ESM.pdf [file 13071_2021_4612_MOESM1_ESM.pdf]

**Additional File 1** Model rankings exploring factors affecting detection probability ( $p$ ) and prevalence ( $\psi$ ) of *Haemoproteus* parasites across host species.

| Model                                                                  | K  | $\Delta AICc$ | $w_i$ | Deviance |
|------------------------------------------------------------------------|----|---------------|-------|----------|
| $\sigma(.) + p(\text{PCR run}) + \psi(\text{nest+year})$               | 7  | 0.00          | 0.30  | 891.71   |
| $\sigma(.) + p(\text{PCR run}) + \psi(\text{year})$                    | 6  | 1.58          | 0.13  | 895.35   |
| $\sigma(.) + p(\text{PCR run}) + \psi(\text{year+migration})$          | 7  | 3.41          | 0.05  | 895.12   |
| $\sigma(.) + p(\text{PCR run}) + \psi(\text{sex+year})$                | 7  | 3.63          | 0.05  | 895.34   |
| $\sigma(.) + p(\text{PCR run}) + \psi(\text{year+BCI})$                | 7  | 3.64          | 0.05  | 895.35   |
| $\sigma(.) + p(\text{PCR run}) + \psi(\text{sex+nest+year})$           | 9  | 4.16          | 0.04  | 891.70   |
| $\sigma(.) + p(\text{PCR run}) + \psi(\text{nest+year+BCI})$           | 9  | 4.16          | 0.04  | 891.71   |
| $\sigma(.) + p(\text{PCR run}) + \psi(\text{nest+year+migration})$     | 9  | 4.16          | 0.04  | 891.71   |
| $\sigma(.) + p(\text{PCR run}) + \psi(\text{BCI})$                     | 6  | 5.07          | 0.02  | 898.84   |
| $\sigma(.) + p(\text{PCR run}) + \psi(\text{nest+BCI})$                | 8  | 5.30          | 0.02  | 894.94   |
| $\sigma(.) + p(\text{PCR run}) + \psi(\text{sex+year+migration})$      | 8  | 5.49          | 0.02  | 895.12   |
| $\sigma(.) + p(\text{PCR run}) + \psi(\text{year+BCI+migration})$      | 8  | 5.49          | 0.02  | 895.12   |
| $\sigma(.) + p(\text{PCR run}) + \psi(\text{sex+year+BCI})$            | 8  | 5.70          | 0.02  | 895.33   |
| $\sigma(.) + p(\text{PCR run}) + \psi(.)$                              | 5  | 6.15          | 0.01  | 901.98   |
| $\sigma(.) + p(\text{PCR run}) + \psi(\text{sex+nest+year+BCI})$       | 10 | 6.25          | 0.01  | 891.70   |
| $\sigma(.) + p(\text{PCR run}) + \psi(\text{sex+nest+year+migration})$ | 10 | 6.25          | 0.01  | 891.70   |
| $\sigma(.) + p(\text{PCR run}) + \psi(\text{nest+year+BCI+migration})$ | 10 | 6.25          | 0.01  | 891.71   |
| $\sigma(.) + p(\text{PCR run}) + \psi(\text{BCI+migration})$           | 7  | 6.30          | 0.01  | 898.01   |
| $\sigma(.) + p(\text{PCR run}) + \psi(\text{nest})$                    | 7  | 6.34          | 0.01  | 898.05   |
| $\sigma(.) + p(\text{PCR run}) + \psi(\text{sex+BCI})$                 | 7  | 7.01          | 0.01  | 898.72   |
| $\sigma(.) + p(\text{PCR run}) + \psi(\text{age+year})$                | 9  | 7.04          | 0.01  | 894.59   |
| $\sigma(.) + p(\text{PCR run}) + \psi(\text{nest+BCI+migration})$      | 9  | 7.18          | 0.01  | 894.73   |
| $\sigma(.) + p(\text{PCR run}) + \psi(\text{sex+nest+BCI})$            | 9  | 7.36          | 0.01  | 894.91   |

|                                                                            |    |       |      |        |
|----------------------------------------------------------------------------|----|-------|------|--------|
| $\sigma(.) + p(\text{PCR run}) + \psi(\text{age+nest+year})$               | 11 | 7.43  | 0.01 | 890.78 |
| $\sigma(.) + p(\text{PCR run}) + \psi(\text{sex+year+BCI+migration})$      | 9  | 7.57  | 0.01 | 895.12 |
| $\sigma(.) + p(\text{PCR run}) + \psi(\text{migration})$                   | 6  | 7.64  | 0.01 | 901.42 |
| $\sigma(.) + p(\text{PCR run}) + \psi(\text{sex})$                         | 6  | 8.03  | 0.01 | 901.80 |
| $\sigma(.) + p(\text{PCR run}) + \psi(\text{sex+BCI+migration})$           | 8  | 8.33  | 0.00 | 897.97 |
| $\sigma(.) + p(\text{PCR run}) + \psi(\text{nest+migration})$              | 8  | 8.35  | 0.00 | 897.98 |
| $\sigma(.) + p(\text{PCR run}) + \psi(\text{sex+nest})$                    | 8  | 8.35  | 0.00 | 897.98 |
| $\sigma(.) + p(\text{PCR run}) + \psi(\text{sex+nest+year+BCI+migration})$ | 11 | 8.35  | 0.00 | 891.70 |
| $\sigma(.) + p(.) + \psi(\text{year})$                                     | 3  | 8.45  | 0.00 | 908.37 |
| $\sigma(.) + p(\text{PCR run}) + \psi(\text{age+year+migration})$          | 10 | 8.95  | 0.00 | 894.40 |
| $\sigma(.) + p(\text{PCR run}) + \psi(\text{sex+age+year})$                | 10 | 9.13  | 0.00 | 894.58 |
| $\sigma(.) + p(\text{PCR run}) + \psi(\text{age+year+BCI})$                | 10 | 9.13  | 0.00 | 894.58 |
| $\sigma(.) + p(\text{PCR run}) + \psi(\text{sex+nest+BCI+migration})$      | 10 | 9.26  | 0.00 | 894.71 |
| $\sigma(.) + p(\text{PCR run}) + \psi(\text{sex+age+nest+year})$           | 12 | 9.54  | 0.00 | 890.78 |
| $\sigma(.) + p(\text{PCR run}) + \psi(\text{age+nest+year+migration})$     | 12 | 9.54  | 0.00 | 890.78 |
| $\sigma(.) + p(\text{PCR run}) + \psi(\text{age+nest+year+BCI})$           | 12 | 9.55  | 0.00 | 890.78 |
| $\sigma(.) + p(\text{PCR run}) + \psi(\text{sex+migration})$               | 7  | 9.61  | 0.00 | 901.32 |
| $\sigma(.) + p(.) + \psi(\text{year+migration})$                           | 4  | 10.26 | 0.00 | 908.14 |
| $\sigma(.) + p(\text{PCR run}) + \psi(\text{sex+nest+migration})$          | 9  | 10.38 | 0.00 | 897.93 |
| $\sigma(.) + p(.) + \psi(\text{sex+year})$                                 | 4  | 10.47 | 0.00 | 908.35 |
| $\sigma(.) + p(\text{PCR run}) + \psi(\text{age+BCI})$                     | 9  | 10.78 | 0.00 | 898.33 |
| $\sigma(.) + p(.) + \psi(\text{nest+year})$                                | 6  | 10.95 | 0.00 | 904.72 |
| $\sigma(.) + p(\text{PCR run}) + \psi(\text{age+nest+BCI})$                | 11 | 11.01 | 0.00 | 894.35 |
| $\sigma(.) + p(\text{PCR run}) + \psi(\text{sex+age+year+migration})$      | 11 | 11.05 | 0.00 | 894.40 |
| $\sigma(.) + p(\text{PCR run}) + \psi(\text{age+year+BCI+migration})$      | 11 | 11.05 | 0.00 | 894.40 |
| $\sigma(.) + p(\text{PCR run}) + \psi(\text{sex+age+year+BCI})$            | 11 | 11.22 | 0.00 | 894.57 |
| $\sigma(.) + p(\text{PCR run}) + \psi(\text{sex+age+nest+year+migration})$ | 13 | 11.67 | 0.00 | 890.78 |
| $\sigma(.) + p(\text{PCR run}) + \psi(\text{sex+age+nest+year+BCI})$       | 13 | 11.67 | 0.00 | 890.78 |
| $\sigma(.) + p(\text{PCR run}) + \psi(\text{age+nest+year+BCI+migration})$ | 13 | 11.67 | 0.00 | 890.78 |

|                                                                                                                   |    |       |      |        |
|-------------------------------------------------------------------------------------------------------------------|----|-------|------|--------|
| $\sigma(.) + p(\text{PCR run}) + \psi(\text{age})$                                                                | 8  | 11.75 | 0.00 | 901.38 |
| $\sigma(.) + p(\text{PCR run}) + \psi(\text{age}+\text{nest})$                                                    | 10 | 12.00 | 0.00 | 897.46 |
| $\sigma(.) + p(\text{PCR run}) + \psi(\text{age}+\text{BCI}+\text{migration})$                                    | 10 | 12.17 | 0.00 | 897.63 |
| $\sigma(.) + p(.) + \psi(\text{year}+\text{BCI})$                                                                 | 5  | 12.53 | 0.00 | 908.36 |
| $\sigma(.) + p(\text{PCR run}) + \psi(\text{sex}+\text{age}+\text{BCI})$                                          | 10 | 12.76 | 0.00 | 898.21 |
| $\sigma(.) + p(\text{PCR run}) + \psi(\text{age}+\text{nest}+\text{BCI}+\text{migration})$                        | 12 | 12.97 | 0.00 | 894.20 |
| $\sigma(.) + p(.) + \psi(\text{sex}+\text{nest}+\text{year})$                                                     | 7  | 13.01 | 0.00 | 904.72 |
| $\sigma(.) + p(.) + \psi(\text{nest}+\text{year}+\text{BCI})$                                                     | 7  | 13.01 | 0.00 | 904.72 |
| $\sigma(.) + p(.) + \psi(\text{nest}+\text{year}+\text{migration})$                                               | 7  | 13.01 | 0.00 | 904.72 |
| $\sigma(.) + p(\text{PCR run}) + \psi(\text{sex}+\text{age}+\text{nest}+\text{BCI})$                              | 12 | 13.08 | 0.00 | 894.32 |
| $\sigma(.) + p(\text{PCR run}) + \psi(\text{sex}+\text{age}+\text{year}+\text{BCI}+\text{migration})$             | 12 | 13.16 | 0.00 | 894.40 |
| $\sigma(.) + p(\text{PCR run}) + \psi(\text{age}+\text{migration})$                                               | 9  | 13.43 | 0.00 | 900.98 |
| $\sigma(.) + p(\text{PCR run}) + \psi(\text{sex}+\text{age})$                                                     | 9  | 13.65 | 0.00 | 901.20 |
| $\sigma(.) + p(\text{PCR run}) + \psi(\text{sex}+\text{age}+\text{nest}+\text{year}+\text{BCI}+\text{migration})$ | 14 | 13.80 | 0.00 | 890.77 |
| $\sigma(.) + p(.) + \psi(\text{BCI})$                                                                             | 4  | 13.98 | 0.00 | 911.86 |
| $\sigma(.) + p(\text{PCR run}) + \psi(\text{sex}+\text{age}+\text{nest})$                                         | 11 | 14.03 | 0.00 | 897.38 |
| $\sigma(.) + p(\text{PCR run}) + \psi(\text{age}+\text{nest}+\text{migration})$                                   | 11 | 14.08 | 0.00 | 897.43 |
| $\sigma(.) + p(.) + \psi(\text{nest}+\text{BCI})$                                                                 | 6  | 14.17 | 0.00 | 907.95 |
| $\sigma(.) + p(\text{PCR run}) + \psi(\text{sex}+\text{age}+\text{BCI}+\text{migration})$                         | 11 | 14.23 | 0.00 | 897.58 |
| $\sigma(.) + p(.) + \psi(\text{sex}+\text{year}+\text{migration})$                                                | 6  | 14.36 | 0.00 | 908.13 |
| $\sigma(.) + p(.) + \psi(\text{year}+\text{BCI}+\text{migration})$                                                | 6  | 14.36 | 0.00 | 908.13 |
| $\sigma(.) + p(.) + \psi(\text{sex}+\text{year}+\text{BCI})$                                                      | 6  | 14.57 | 0.00 | 908.35 |
| $\sigma(.) + p(.) + \psi(.)$                                                                                      | 3  | 15.08 | 0.00 | 914.99 |
| $\sigma(.) + p(\text{PCR run}) + \psi(\text{sex}+\text{age}+\text{nest}+\text{BCI}+\text{migration})$             | 13 | 15.08 | 0.00 | 894.19 |
| $\sigma(.) + p(.) + \psi(\text{sex}+\text{nest}+\text{year}+\text{BCI})$                                          | 8  | 15.08 | 0.00 | 904.72 |
| $\sigma(.) + p(.) + \psi(\text{sex}+\text{nest}+\text{year}+\text{migration})$                                    | 8  | 15.08 | 0.00 | 904.72 |
| $\sigma(.) + p(.) + \psi(\text{nest}+\text{year}+\text{BCI}+\text{migration})$                                    | 8  | 15.09 | 0.00 | 904.72 |
| $\sigma(.) + p(.) + \psi(\text{BCI}+\text{migration})$                                                            | 5  | 15.19 | 0.00 | 911.02 |
| $\sigma(.) + p(.) + \psi(\text{nest})$                                                                            | 5  | 15.24 | 0.00 | 911.07 |

|                                                                       |    |       |      |        |
|-----------------------------------------------------------------------|----|-------|------|--------|
| $\sigma(.) + p(\text{PCR run}) + \psi(\text{sex+age+migration})$      | 10 | 15.42 | 0.00 | 900.87 |
| $\sigma(.) + p(.) + \psi(\text{age+year})$                            | 7  | 15.90 | 0.00 | 907.60 |
| $\sigma(.) + p(.) + \psi(\text{sex+BCI})$                             | 5  | 15.91 | 0.00 | 911.74 |
| $\sigma(.) + p(.) + \psi(\text{nest+BCI+migration})$                  | 7  | 16.03 | 0.00 | 907.74 |
| $\sigma(.) + p(\text{PCR run}) + \psi(\text{sex+age+nest+migration})$ | 12 | 16.13 | 0.00 | 897.37 |
| $\sigma(.) + p(.) + \psi(\text{sex+nest+BCI})$                        | 7  | 16.21 | 0.00 | 907.92 |
| $\sigma(.) + p(.) + \psi(\text{age+nest+year})$                       | 9  | 16.25 | 0.00 | 903.80 |
| $\sigma(.) + p(.) + \psi(\text{sex+year+BCI+migration})$              | 7  | 16.42 | 0.00 | 908.13 |
| $\sigma(.) + p(.) + \psi(\text{migration})$                           | 4  | 16.55 | 0.00 | 914.43 |
| $\sigma(.) + p(.) + \psi(\text{sex})$                                 | 4  | 16.94 | 0.00 | 914.82 |
| $\sigma(.) + p(.) + \psi(\text{sex+nest+year+BCI+migration})$         | 9  | 17.17 | 0.00 | 904.72 |
| $\sigma(.) + p(.) + \psi(\text{sex+BCI+migration})$                   | 6  | 17.21 | 0.00 | 910.98 |
| $\sigma(.) + p(.) + \psi(\text{nest+migration})$                      | 6  | 17.22 | 0.00 | 910.99 |
| $\sigma(.) + p(.) + \psi(\text{sex+nest})$                            | 6  | 17.22 | 0.00 | 911.00 |
| $\sigma(.) + p(.) + \psi(\text{age+year+migration})$                  | 8  | 17.78 | 0.00 | 907.41 |
| $\sigma(.) + p(.) + \psi(\text{sex+age+year})$                        | 8  | 17.96 | 0.00 | 907.59 |
| $\sigma(.) + p(.) + \psi(\text{age+year+BCI})$                        | 8  | 17.96 | 0.00 | 907.60 |
| $\sigma(.) + p(.) + \psi(\text{sex+nest+BCI+migration})$              | 8  | 18.09 | 0.00 | 907.73 |
| $\sigma(.) + p(.) + \psi(\text{sex+age+nest+year})$                   | 10 | 18.34 | 0.00 | 903.79 |
| $\sigma(.) + p(.) + \psi(\text{age+nest+year+migration})$             | 10 | 18.34 | 0.00 | 903.79 |
| $\sigma(.) + p(.) + \psi(\text{age+nest+year+BCI})$                   | 10 | 18.34 | 0.00 | 903.79 |
| $\sigma(.) + p(.) + \psi(\text{sex+migration})$                       | 5  | 18.51 | 0.00 | 914.34 |
| $\sigma(.) + p(.) + \psi(\text{sex+nest+migration})$                  | 7  | 19.23 | 0.00 | 910.94 |
| $\sigma(.) + p(.) + \psi(\text{age+BCI})$                             | 7  | 19.64 | 0.00 | 911.35 |
| $\sigma(.) + p(.) + \psi(\text{age+nest+BCI})$                        | 9  | 19.82 | 0.00 | 907.37 |
| $\sigma(.) + p(.) + \psi(\text{sex+age+year+migration})$              | 9  | 19.86 | 0.00 | 907.41 |
| $\sigma(.) + p(.) + \psi(\text{age+year+BCI+migration})$              | 9  | 19.87 | 0.00 | 907.41 |
| $\sigma(.) + p(.) + \psi(\text{sex+age+year+BCI})$                    | 9  | 20.04 | 0.00 | 907.59 |
| $\sigma(.) + p(.) + \psi(\text{sex+age+nest+year+migration})$         | 11 | 20.44 | 0.00 | 903.79 |

|                                                                   |    |       |      |        |
|-------------------------------------------------------------------|----|-------|------|--------|
| $\sigma(.) + p(.) + \psi(\text{sex+age+nest+year+BCI})$           | 11 | 20.44 | 0.00 | 903.79 |
| $\sigma(.) + p(.) + \psi(\text{age+nest+year+BCI+migration})$     | 11 | 20.44 | 0.00 | 903.79 |
| $\sigma(.) + p(.) + \psi(\text{age})$                             | 6  | 20.62 | 0.00 | 914.40 |
| $\sigma(.) + p(.) + \psi(\text{age+nest})$                        | 8  | 20.84 | 0.00 | 910.47 |
| $\sigma(.) + p(.) + \psi(\text{age+BCI+migration})$               | 8  | 21.01 | 0.00 | 910.64 |
| $\sigma(.) + p(.) + \psi(\text{sex+age+BCI})$                     | 8  | 21.59 | 0.00 | 911.22 |
| $\sigma(.) + p(.) + \psi(\text{age+nest+BCI+migration})$          | 10 | 21.76 | 0.00 | 907.22 |
| $\sigma(.) + p(.) + \psi(\text{sex+age+nest+BCI})$                | 10 | 21.88 | 0.00 | 907.33 |
| $\sigma(.) + p(.) + \psi(\text{sex+age+year+BCI+migration})$      | 10 | 21.96 | 0.00 | 907.41 |
| $\sigma(.) + p(.) + \psi(\text{age+migration})$                   | 7  | 22.28 | 0.00 | 913.99 |
| $\sigma(.) + p(.) + \psi(\text{sex+age})$                         | 7  | 22.51 | 0.00 | 914.22 |
| $\sigma(.) + p(.) + \psi(\text{sex+age+nest+year+BCI+migration})$ | 12 | 22.55 | 0.00 | 903.79 |
| $\sigma(.) + p(.) + \psi(\text{sex+age+nest})$                    | 9  | 22.85 | 0.00 | 910.40 |
| $\sigma(.) + p(.) + \psi(\text{age+nest+migration})$              | 9  | 22.90 | 0.00 | 910.45 |
| $\sigma(.) + p(.) + \psi(\text{sex+age+BCI+migration})$           | 9  | 23.04 | 0.00 | 910.59 |
| $\sigma(.) + p(.) + \psi(\text{sex+age+nest+BCI+migration})$      | 11 | 23.85 | 0.00 | 907.20 |
| $\sigma(.) + p(.) + \psi(\text{sex+age+migration})$               | 8  | 24.25 | 0.00 | 913.88 |
| $\sigma(.) + p(.) + \psi(\text{sex+age+nest+migration})$          | 10 | 24.93 | 0.00 | 910.38 |

---

Model rankings of the complete set of models exploring factors affecting detection probability ( $p$ ) and prevalence ( $\psi$ ) of *Haemoproteus* parasites across host species. Host bird species were captured and sampled at a high-elevation valley in northern Colorado during 2017-2018. ‘PCR run’ indicates the 3 PCR replicates carried out for each sample. ‘Nest’ indicates nest type (open, ground, or cavity). BCI is body condition index defined as the ration of body mass (g) to tarsus length (mm) for each individual. The number of parameters ( $K$ ), model weights ( $w_i$ ), and deviance are shown for each model and the

models are ranked by their AICc differences relative to the best model in the set ( $\Delta\text{AICc}_i$ ). Sigma ( $\sigma$ ) was a random effect included in every model to account for unmodeled heterogeneity.
