# Supplementary material for: Sex and nest type influence avian blood parasite prevalence in a high-elevation bird community
Source: PubMed Central journal article supplement (PMC7938522; doi:10.1186/s13071-021-04612-w), 2021-03-08
Supplement: 13071_2021_4612_MOESM2_ESM.pdf [file 13071_2021_4612_MOESM2_ESM.pdf]

**Additional File 2** Model rankings exploring factors affecting detection probability ( $p$ ) and prevalence ( $\psi$ ) of *Haemoproteus* parasites in American Robins.

| <b>Model</b>                                                | <b>K</b> | <b><math>\Delta AICc</math></b> | <b><math>w_i</math></b> | <b>Deviance</b> |
|-------------------------------------------------------------|----------|---------------------------------|-------------------------|-----------------|
| $\sigma(.) + p(.) + \psi(.)$                                | 3        | 0.00                            | 0.33                    | 104.05          |
| $\sigma(.) + p(.) + \psi(\text{sex})$                       | 4        | 1.66                            | 0.15                    | 103.23          |
| $\sigma(.) + p(.) + \psi(\text{BCI})$                       | 4        | 1.66                            | 0.15                    | 103.24          |
| $\sigma(.) + p(.) + \psi(\text{year})$                      | 4        | 2.44                            | 0.10                    | 104.01          |
| $\sigma(.) + p(.) + \psi(\text{sex+BCI})$                   | 5        | 3.28                            | 0.06                    | 102.23          |
| $\sigma(.) + p(.) + \psi(\text{year+BCI})$                  | 5        | 3.34                            | 0.06                    | 102.29          |
| $\sigma(.) + p(.) + \psi(\text{sex+year})$                  | 5        | 4.27                            | 0.04                    | 103.22          |
| $\sigma(.) + p(\text{PCR run}) + \psi(.)$                   | 5        | 4.90                            | 0.03                    | 103.85          |
| $\sigma(.) + p(.) + \psi(\text{sex+year+BCI})$              | 6        | 5.61                            | 0.02                    | 101.79          |
| $\sigma(.) + p(\text{PCR run}) + \psi(\text{sex})$          | 6        | 6.86                            | 0.01                    | 103.04          |
| $\sigma(.) + p(\text{run}) + \psi(\text{BCI})$              | 6        | 6.87                            | 0.01                    | 103.04          |
| $\sigma(.) + p(.) + \psi(\text{age})$                       | 6        | 6.90                            | 0.01                    | 103.07          |
| $\sigma(.) + p(\text{PCR run}) + \psi(\text{year})$         | 6        | 7.64                            | 0.01                    | 103.81          |
| $\sigma(.) + p(\text{PCR run}) + \psi(\text{sex+BCI})$      | 7        | 8.81                            | 0.00                    | 102.03          |
| $\sigma(.) + p(\text{PCR run}) + \psi(\text{year+BCI})$     | 7        | 8.88                            | 0.00                    | 102.10          |
| $\sigma(.) + p(.) + \psi(\text{sex+age})$                   | 7        | 9.35                            | 0.00                    | 102.57          |
| $\sigma(.) + p(.) + \psi(\text{age+BCI})$                   | 7        | 9.41                            | 0.00                    | 102.63          |
| $\sigma(.) + p(.) + \psi(\text{age+year})$                  | 7        | 9.78                            | 0.00                    | 103.00          |
| $\sigma(.) + p(\text{PCR run}) + \psi(\text{sex+year})$     | 7        | 9.81                            | 0.00                    | 103.02          |
| $\sigma(.) + p(\text{PCR run}) + \psi(\text{sex+year+BCI})$ | 8        | 11.52                           | 0.00                    | 101.59          |
| $\sigma(.) + p(.) + \psi(\text{age+year+BCI})$              | 8        | 11.67                           | 0.00                    | 101.74          |
| $\sigma(.) + p(.) + \psi(\text{sex+age+BCI})$               | 8        | 11.86                           | 0.00                    | 101.94          |
| $\sigma(.) + p(.) + \psi(\text{sex+age+year})$              | 8        | 12.50                           | 0.00                    | 102.57          |
| $\sigma(.) + p(\text{PCR run}) + \psi(\text{age})$          | 8        | 12.80                           | 0.00                    | 102.88          |

|                                                                 |    |       |      |        |
|-----------------------------------------------------------------|----|-------|------|--------|
| $\sigma(.) + p(.) + \psi(\text{sex+age+year+BCI})$              | 9  | 14.75 | 0.00 | 101.47 |
| $\sigma(.) + p(\text{PCR run}) + \psi(\text{sex+age})$          | 9  | 15.66 | 0.00 | 102.37 |
| $\sigma(.) + p(\text{PCR run}) + \psi(\text{age+BCI})$          | 9  | 15.72 | 0.00 | 102.43 |
| $\sigma(.) + p(\text{PCR run}) + \psi(\text{age+year})$         | 9  | 16.08 | 0.00 | 102.80 |
| $\sigma(.) + p(\text{PCR run}) + \psi(\text{age+year+BCI})$     | 10 | 18.41 | 0.00 | 101.54 |
| $\sigma(.) + p(\text{PCR run}) + \psi(\text{sex+age+BCI})$      | 10 | 18.61 | 0.00 | 101.74 |
| $\sigma(.) + p(\text{PCR run}) + \psi(\text{sex+age+year})$     | 10 | 19.24 | 0.00 | 102.37 |
| $\sigma(.) + p(\text{PCR run}) + \psi(\text{sex+age+year+BCI})$ | 11 | 21.99 | 0.00 | 101.27 |

Model set and rankings exploring the importance of factors affecting the detection probability (p) and prevalence ( $\psi$ ) of

*Haemoproteus* blood parasites in American Robins captured and sampled at a high-elevation valley in northern Colorado

during 2017-2018. ‘PCR run’ indicates the 3 PCR replicates carried out for each sample. The number of parameters (K), model weights ( $w_i$ ), and deviance are shown for each model and the models are ranked by their AICc differences relative to the best model in the set ( $\Delta\text{AICc}_i$ ). Sigma ( $\sigma$ ) was a random effect included in every model to account for unmodeled heterogeneity.
