# Supplementary material for: Sex and nest type influence avian blood parasite prevalence in a high-elevation bird community
Source: PubMed Central journal article supplement (PMC7938522; doi:10.1186/s13071-021-04612-w), 2021-03-08
Supplement: 13071_2021_4612_MOESM3_ESM.pdf [file 13071_2021_4612_MOESM3_ESM.pdf]

**Additional File 3** Model rankings exploring factors affecting detection probability ( $p$ ) and prevalence ( $\psi$ ) of *Haemoproteus* parasites in Lincoln's Sparrows.

| <b>Model</b>                                                    | <b>K</b> | <b><math>\Delta AICc</math></b> | <b><math>w_i</math></b> | <b>Deviance</b> |
|-----------------------------------------------------------------|----------|---------------------------------|-------------------------|-----------------|
| $\sigma(.) + p(\text{PCR run}) + \psi(.)$                       | 4        | 0.00                            | 0.27                    | 102.29          |
| $\sigma(.) + p(\text{PCR run}) + \psi(\text{sex})$              | 5        | 1.56                            | 0.12                    | 101.51          |
| $\sigma(.) + p(\text{PCR run}) + \psi(\text{year})$             | 5        | 2.04                            | 0.10                    | 101.99          |
| $\sigma(.) + p(\text{PCR run}) + \psi(\text{BCI})$              | 5        | 2.10                            | 0.10                    | 102.06          |
| $\sigma(.) + p(\text{PCR run}) + \psi(\text{age})$              | 7        | 2.29                            | 0.09                    | 97.33           |
| $\sigma(.) + p(\text{PCR run}) + \psi(\text{age+year})$         | 8        | 3.65                            | 0.04                    | 96.10           |
| $\sigma(.) + p(\text{PCR run}) + \psi(\text{sex+year})$         | 6        | 3.67                            | 0.04                    | 101.21          |
| $\sigma(.) + p(\text{PCR run}) + \psi(\text{age+BCI})$          | 8        | 3.68                            | 0.04                    | 96.14           |
| $\sigma(.) + p(\text{PCR run}) + \psi(\text{sex+BCI})$          | 6        | 3.72                            | 0.04                    | 101.26          |
| $\sigma(.) + p(\text{PCR run}) + \psi(\text{year+BCI})$         | 6        | 4.45                            | 0.03                    | 101.98          |
| $\sigma(.) + p(\text{PCR run}) + \psi(\text{sex+age})$          | 8        | 4.61                            | 0.03                    | 97.07           |
| $\sigma(.) + p(\text{PCR run}) + \psi(\text{sex+age+year})$     | 9        | 6.11                            | 0.01                    | 95.89           |
| $\sigma(.) + p(\text{PCR run}) + \psi(\text{sex+age+BCI})$      | 9        | 6.13                            | 0.01                    | 95.91           |
| $\sigma(.) + p(\text{PCR run}) + \psi(\text{sex+year+BCI})$     | 7        | 6.17                            | 0.01                    | 101.21          |
| $\sigma(.) + p(\text{PCR run}) + \psi(\text{age+year+BCI})$     | 9        | 6.31                            | 0.01                    | 96.09           |
| $\sigma(.) + p(.) + \psi(.)$                                    | 2        | 6.57                            | 0.01                    | 113.32          |
| $\sigma(.) + p(.) + \psi(\text{sex})$                           | 3        | 7.98                            | 0.01                    | 112.54          |
| $\sigma(.) + p(.) + \psi(\text{age})$                           | 5        | 8.40                            | 0.00                    | 108.36          |
| $\sigma(.) + p(.) + \psi(\text{year})$                          | 3        | 8.46                            | 0.00                    | 113.02          |
| $\sigma(.) + p(.) + \psi(\text{BCI})$                           | 3        | 8.53                            | 0.00                    | 113.08          |
| $\sigma(.) + p(\text{PCR run}) + \psi(\text{sex+age+year+BCI})$ | 10       | 8.86                            | 0.00                    | 95.87           |
| $\sigma(.) + p(.) + \psi(\text{age+year})$                      | 6        | 9.67                            | 0.00                    | 107.21          |
| $\sigma(.) + p(.) + \psi(\text{age+BCI})$                       | 6        | 9.74                            | 0.00                    | 107.27          |
| $\sigma(.) + p(.) + \psi(\text{sex+year})$                      | 4        | 9.94                            | 0.00                    | 112.24          |

|                                                                                           |          |              |             |               |
|-------------------------------------------------------------------------------------------|----------|--------------|-------------|---------------|
| $\sigma(.) + p(.) + \psi(\text{sex}+\text{BCI})$                                          | 4        | 9.99         | 0.00        | 112.28        |
| $\sigma(.) + p(.) + \psi(\text{sex}+\text{age})$                                          | 6        | 10.62        | 0.00        | 108.16        |
| $\sigma(.) + p(.) + \psi(\text{year}+\text{BCI})$                                         | 4        | 10.72        | 0.00        | 113.01        |
| $\sigma(.) + p(.) + \psi(\text{sex}+\text{age}+\text{year})$                              | 7        | 11.99        | 0.00        | 107.03        |
| $\sigma(.) + p(.) + \psi(\text{sex}+\text{age}+\text{BCI})$                               | 7        | 12.05        | 0.00        | 107.09        |
| $\sigma(.) + p(.) + \psi(\text{age}+\text{year}+\text{BCI})$                              | 7        | 12.16        | 0.00        | 107.21        |
| $\sigma(.) + p(.) + \psi(\text{sex}+\text{year}+\text{BCI})$                              | 5        | 12.28        | 0.00        | 112.23        |
| <u><math>\sigma(.) + p(.) + \psi(\text{sex}+\text{age}+\text{year}+\text{BCI})</math></u> | <u>8</u> | <u>14.58</u> | <u>0.00</u> | <u>107.03</u> |

Model set and rankings exploring the importance of factors affecting the detection probability (p) and prevalence ( $\psi$ ) of

*Haemoproteus* blood parasites in Lincoln Sparrows captured and sampled at a high-elevation valley in northern Colorado

during 2017-2018. ‘PCR run’ indicates the 3 PCR replicates carried out for each sample. The number of parameters (K), model

weights ( $w_i$ ), and deviance are shown for each model and the models are ranked by their AICc differences relative to the best

model in the set ( $\Delta\text{AICc}_i$ ). Sigma ( $\sigma$ ) was a random effect included in every model to account for unmodeled heterogeneity.
