# Supplementary material for: Sex and nest type influence avian blood parasite prevalence in a high-elevation bird community
Source: PubMed Central journal article supplement (PMC7938522; doi:10.1186/s13071-021-04612-w), 2021-03-08
Supplement: 13071_2021_4612_MOESM4_ESM.pdf [file 13071_2021_4612_MOESM4_ESM.pdf]

**Additional File 4** Model rankings exploring factors affecting detection probability ( $p$ ) and prevalence ( $\psi$ ) of *Haemoproteus* parasites in Mountain Chickadees.

| <b>Model</b>                                                         | <b>K</b> | <b><math>\Delta AICc</math></b> | <b><math>w_i</math></b> | <b>Deviance</b> |
|----------------------------------------------------------------------|----------|---------------------------------|-------------------------|-----------------|
| $\sigma(\cdot) + p(\cdot) + \psi(\cdot)$                             | 2        | 0.00                            | 0.55                    | 35.57           |
| $\sigma(\cdot) + p(\cdot) + \psi(\text{BCI})$                        | 3        | 2.23                            | 0.18                    | 35.01           |
| $\sigma(\cdot) + p(\cdot) + \psi(\text{year})$                       | 3        | 2.30                            | 0.17                    | 35.08           |
| $\sigma(\cdot) + p(\cdot) + \psi(\text{year} + \text{BCI})$          | 4        | 5.24                            | 0.04                    | 34.85           |
| $\sigma(\cdot) + p(\text{PCR run}) + \psi(\cdot)$                    | 4        | 5.35                            | 0.04                    | 34.97           |
| $\sigma(\cdot) + p(\text{PCR run}) + \psi(\text{BCI})$               | 5        | 8.40                            | 0.01                    | 34.40           |
| $\sigma(\cdot) + p(\text{PCR run}) + \psi(\text{year})$              | 5        | 8.48                            | 0.01                    | 34.47           |
| $\sigma(\cdot) + p(\text{PCR run}) + \psi(\text{year} + \text{BCI})$ | 6        | 12.43                           | 0.00                    | 34.24           |

Model set and rankings exploring the importance of factors affecting the detection probability ( $p$ ) and prevalence ( $\psi$ ) of *Haemoproteus* blood parasites in for Mountain Chickadees captured and sampled at a high-elevation valley in northern Colorado during 2017-2018. ‘PCR run’ indicates the 3 PCR replicates carried out for each sample. The number of parameters (K), model weights ( $w_i$ ), and deviance are shown for each model and the models are ranked by their AICc differences relative to the best model in the set ( $\Delta AICc_i$ ). Sigma ( $\sigma$ ) was a random effect included in every model to account for unmodeled heterogeneity.
