# Supplementary material for: Sex and nest type influence avian blood parasite prevalence in a high-elevation bird community
Source: PubMed Central journal article supplement (PMC7938522; doi:10.1186/s13071-021-04612-w), 2021-03-08
Supplement: 13071_2021_4612_MOESM5_ESM.pdf [file 13071_2021_4612_MOESM5_ESM.pdf]

**Additional File 5** Model rankings exploring factors affecting detection probability ( $p$ ) and prevalence ( $\psi$ ) of *Haemoproteus* parasites in Pine Siskins.

| <b>Model</b>                                                   | <b>K</b> | <b><math>\Delta AICc</math></b> | <b><math>w_i</math></b> | <b>Deviance</b> |
|----------------------------------------------------------------|----------|---------------------------------|-------------------------|-----------------|
| $\sigma(.) + p(.) + \psi(.)$                                   | 2        | 0.00                            | 0.14                    | 57.14           |
| $\sigma(.) + p(.) + \psi(\text{BCI})$                          | 3        | 0.29                            | 0.12                    | 55.09           |
| $\sigma(.) + p(.) + \psi(\text{year})$                         | 3        | 0.57                            | 0.11                    | 55.37           |
| $\sigma(.) + p(.) + \psi(\text{age})$                          | 3        | 1.76                            | 0.06                    | 56.56           |
| $\sigma(.) + p(.) + \psi(\text{sex}+\text{BCI})$               | 4        | 1.88                            | 0.06                    | 54.20           |
| $\sigma(.) + p(\text{PCR run}) + \psi(.)$                      | 4        | 1.98                            | 0.05                    | 54.30           |
| $\sigma(.) + p(.) + \psi(\text{sex})$                          | 3        | 2.29                            | 0.05                    | 57.09           |
| $\sigma(.) + p(.) + \psi(\text{sex}+\text{year})$              | 4        | 2.36                            | 0.04                    | 54.69           |
| $\sigma(.) + p(\text{PCR run}) + \psi(\text{BCI})$             | 5        | 2.55                            | 0.04                    | 52.24           |
| $\sigma(.) + p(.) + \psi(\text{age}+\text{BCI})$               | 4        | 2.60                            | 0.04                    | 54.93           |
| $\sigma(.) + p(.) + \psi(\text{BCI}+\text{year})$              | 4        | 2.76                            | 0.04                    | 55.08           |
| $\sigma(.) + p(\text{PCR run}) + \psi(\text{year})$            | 5        | 2.83                            | 0.03                    | 52.53           |
| $\sigma(.) + p(.) + \psi(\text{age}+\text{year})$              | 4        | 2.83                            | 0.03                    | 55.16           |
| $\sigma(.) + p(\text{PCR run}) + \psi(\text{age})$             | 5        | 4.02                            | 0.02                    | 53.72           |
| $\sigma(.) + p(.) + \psi(\text{sex}+\text{age})$               | 4        | 4.08                            | 0.02                    | 56.41           |
| $\sigma(.) + p(.) + \psi(\text{sex}+\text{age}+\text{BCI})$    | 5        | 4.38                            | 0.02                    | 54.08           |
| $\sigma(.) + p(\text{PCR run}) + \psi(\text{sex}+\text{BCI})$  | 6        | 4.45                            | 0.02                    | 51.37           |
| $\sigma(.) + p(.) + \psi(\text{sex}+\text{BCI}+\text{year})$   | 5        | 4.50                            | 0.01                    | 54.20           |
| $\sigma(.) + p(\text{PCR run}) + \psi(\text{sex})$             | 5        | 4.55                            | 0.01                    | 54.25           |
| $\sigma(.) + p(.) + \psi(\text{sex}+\text{age}+\text{year})$   | 5        | 4.76                            | 0.01                    | 54.46           |
| $\sigma(.) + p(\text{PCR run}) + \psi(\text{sex}+\text{year})$ | 6        | 4.91                            | 0.01                    | 51.83           |
| $\sigma(.) + p(\text{PCR run}) + \psi(\text{age}+\text{BCI})$  | 6        | 5.17                            | 0.01                    | 52.08           |
| $\sigma(.) + p(.) + \psi(\text{age}+\text{BCI}+\text{year})$   | 5        | 5.23                            | 0.01                    | 54.92           |
| $\sigma(.) + p(\text{PCR run}) + \psi(\text{BCI}+\text{year})$ | 6        | 5.33                            | 0.01                    | 52.24           |

|                                                                 |   |       |      |       |
|-----------------------------------------------------------------|---|-------|------|-------|
| $\sigma(.) + p(\text{PCR run}) + \psi(\text{age+year})$         | 6 | 5.39  | 0.01 | 52.31 |
| $\sigma(.) + p(\text{PCR run}) + \psi(\text{sex+age})$          | 6 | 6.64  | 0.01 | 53.56 |
| $\sigma(.) + p(.) + \psi(\text{sex+age+BCI+year})$              | 6 | 7.16  | 0.00 | 54.08 |
| $\sigma(.) + p(.) + \psi(\text{sex+age+BCI})$                   | 7 | 7.28  | 0.00 | 51.24 |
| $\sigma(.) + p(\text{PCR run}) + \psi(\text{sex+BCI+year})$     | 7 | 7.41  | 0.00 | 51.37 |
| $\sigma(.) + p(\text{PCR run}) + \psi(\text{sex+age+year})$     | 7 | 7.63  | 0.00 | 51.60 |
| $\sigma(.) + p(\text{PCR run}) + \psi(\text{age+BCI+year})$     | 7 | 8.12  | 0.00 | 52.08 |
| $\sigma(.) + p(\text{PCR run}) + \psi(\text{sex+age+BCI+year})$ | 8 | 10.42 | 0.00 | 51.24 |

Model set and rankings exploring the importance of factors affecting the detection probability (p) and prevalence ( $\psi$ ) of

*Haemoproteus* blood parasites in for Pine Siskins captured and sampled at a high-elevation valley in northern Colorado during 2017-2018. ‘PCR run’ indicates the 3 PCR replicates carried out for each sample. The number of parameters (K), model weights ( $w_i$ ), and deviance are shown for each model and the models are ranked by their AICc differences relative to the best model in the set ( $\Delta\text{AICc}_i$ ). Sigma ( $\sigma$ ) was a random effect included in every model to account for unmodeled heterogeneity.
