# Supplementary material for: Sex and nest type influence avian blood parasite prevalence in a high-elevation bird community
Source: PubMed Central journal article supplement (PMC7938522; doi:10.1186/s13071-021-04612-w), 2021-03-08
Supplement: 13071_2021_4612_MOESM7_ESM.pdf [file 13071_2021_4612_MOESM7_ESM.pdf]

**Additional File 7** Model rankings exploring factors affecting detection probability ( $p$ ) and prevalence ( $\psi$ ) of *Haemoproteus* parasites in Ruby-crowned Kinglets.

| <b>Model</b>                                 | <b>K</b> | <b><math>\Delta AICc</math></b> | <b><math>w_i</math></b> | <b>Deviance</b> |
|----------------------------------------------|----------|---------------------------------|-------------------------|-----------------|
| $\sigma(\cdot)+p(\cdot)+\psi(\cdot)+BCI+sex$ | 4        | 0.00                            | 0.52                    | 26.97           |
| $\sigma(\cdot)+p(\cdot)+\psi(\cdot)+BCI$     | 3        | 0.95                            | 0.32                    | 31.01           |
| $\sigma(\cdot)+p(\cdot)+\psi(\cdot)$         | 2        | 3.20                            | 0.10                    | 36.01           |
| $\sigma(\cdot)+p(\cdot)+\psi(\cdot)+sex$     | 3        | 4.50                            | 0.05                    | 34.56           |

Model set and rankings exploring the importance of factors affecting the detection probability ( $p$ ) and prevalence ( $\psi$ ) of

*Haemoproteus* blood parasites in Ruby-crowned Kinglets captured and sampled at a high-elevation valley in northern Colorado during 2017-2018. ‘PCR run’ indicates the 3 PCR replicates carried out for each sample. The number of parameters (K), model weights ( $w_i$ ), and deviance are shown for each model and the models are ranked by their AICc differences relative to the best model in the set ( $\Delta AICc_i$ ). Sigma ( $\sigma$ ) was a random effect included in every model to account for unmodeled heterogeneity.
