# Supplementary material for: Sex and nest type influence avian blood parasite prevalence in a high-elevation bird community
Source: PubMed Central journal article supplement (PMC7938522; doi:10.1186/s13071-021-04612-w), 2021-03-08
Supplement: 13071_2021_4612_MOESM8_ESM.pdf [file 13071_2021_4612_MOESM8_ESM.pdf]

**Additional File 8** Model rankings exploring factors affecting detection probability ( $p$ ) and prevalence ( $\psi$ ) of *Haemoproteus* parasites in Dark-eyed Juncos.

| <b>Model</b>                                                        | <b>K</b> | <b><math>\Delta AICc</math></b> | <b><math>w_i</math></b> | <b>Deviance</b> |
|---------------------------------------------------------------------|----------|---------------------------------|-------------------------|-----------------|
| $\sigma(\cdot) + p(\cdot) + \psi(\cdot)$                            | 3        | 0.00                            | 0.35                    | 70.94           |
| $\sigma(\cdot) + p(\cdot) + \psi(\text{sex})$                       | 4        | 1.32                            | 0.18                    | 69.61           |
| $\sigma(\cdot) + p(\text{PCR run}) + \psi(\cdot)$                   | 5        | 1.59                            | 0.16                    | 67.03           |
| $\sigma(\cdot) + p(\cdot) + \psi(\text{BCI})$                       | 4        | 2.65                            | 0.09                    | 70.94           |
| $\sigma(\cdot) + p(\text{PCR run}) + \psi(\text{sex})$              | 6        | 3.36                            | 0.07                    | 65.69           |
| $\sigma(\cdot) + p(\cdot) + \psi(\text{sex+BCI})$                   | 5        | 3.96                            | 0.05                    | 69.39           |
| $\sigma(\cdot) + p(\text{PCR run}) + \psi(\text{BCI})$              | 6        | 4.69                            | 0.03                    | 67.03           |
| $\sigma(\cdot) + p(\text{PCR run}) + \psi(\text{age})$              | 6        | 6.21                            | 0.02                    | 68.54           |
| $\sigma(\cdot) + p(\text{PCR run}) + \psi(\text{sex+BCI})$          | 7        | 6.51                            | 0.01                    | 65.47           |
| $\sigma(\cdot) + p(\cdot) + \psi(\text{sex+age+BCI})$               | 7        | 7.26                            | 0.01                    | 66.22           |
| $\sigma(\cdot) + p(\cdot) + \psi(\text{sex+age})$                   | 7        | 8.43                            | 0.01                    | 67.39           |
| $\sigma(\cdot) + p(\cdot) + \psi(\text{age+year+BCI})$              | 7        | 8.74                            | 0.00                    | 67.70           |
| $\sigma(\cdot) + p(\cdot) + \psi(\text{age+BCI})$                   | 7        | 9.30                            | 0.00                    | 68.26           |
| $\sigma(\cdot) + p(\text{PCR run}) + \psi(\text{age})$              | 8        | 9.33                            | 0.00                    | 64.62           |
| $\sigma(\cdot) + p(\cdot) + \psi(\text{sex+age+year+BCI})$          | 9        | 11.03                           | 0.00                    | 62.30           |
| $\sigma(\cdot) + p(\text{PCR run}) + \psi(\text{sex+age})$          | 9        | 12.22                           | 0.00                    | 63.48           |
| $\sigma(\cdot) + p(\text{PCR run}) + \psi(\text{age+BCI})$          | 9        | 13.08                           | 0.00                    | 64.34           |
| $\sigma(\cdot) + p(\text{PCR run}) + \psi(\text{age+year})$         | 7        | 14.40                           | 0.00                    | 73.37           |
| $\sigma(\cdot) + p(\text{PCR run}) + \psi(\text{sex+age+BCI})$      | 10       | 15.45                           | 0.00                    | 62.28           |
| $\sigma(\cdot) + p(\text{PCR run}) + \psi(\text{sex+age+year})$     | 8        | 15.97                           | 0.00                    | 71.26           |
| $\sigma(\cdot) + p(\text{PCR run}) + \psi(\text{sex+age+year+BCI})$ | 11       | 16.39                           | 0.00                    | 58.33           |
| $\sigma(\cdot) + p(\text{PCR run}) + \psi(\text{year})$             | 4        | 16.46                           | 0.00                    | 84.76           |
| $\sigma(\cdot) + p(\text{PCR run}) + \psi(\text{age+year+BCI})$     | 10       | 16.96                           | 0.00                    | 63.79           |
| $\sigma(\cdot) + p(\text{PCR run}) + \psi(\text{sex+year})$         | 5        | 18.47                           | 0.00                    | 83.90           |

|                                                             |    |       |      |       |
|-------------------------------------------------------------|----|-------|------|-------|
| $\sigma(.) + p(\text{PCR run}) + \psi(\text{year+BCI})$     | 5  | 19.27 | 0.00 | 84.71 |
| $\sigma(.) + p(\text{PCR run}) + \psi(\text{age+year})$     | 9  | 19.36 | 0.00 | 70.63 |
| $\sigma(.) + p(\text{PCR run}) + \psi(\text{year})$         | 6  | 20.43 | 0.00 | 82.76 |
| $\sigma(.) + p(\text{PCR run}) + \psi(\text{sex+year+BCI})$ | 6  | 21.57 | 0.00 | 83.90 |
| $\sigma(.) + p(\text{PCR run}) + \psi(\text{sex+age+year})$ | 10 | 21.69 | 0.00 | 68.52 |
| $\sigma(.) + p(\text{PCR run}) + \psi(\text{sex+year})$     | 7  | 22.95 | 0.00 | 81.91 |
| $\sigma(.) + p(\text{PCR run}) + \psi(\text{year+BCI})$     | 7  | 23.75 | 0.00 | 82.71 |
| $\sigma(.) + p(\text{PCR run}) + \psi(\text{sex+year+BCI})$ | 8  | 26.62 | 0.00 | 81.91 |

Model set and rankings exploring the importance of factors affecting the detection probability (p) and prevalence ( $\psi$ ) of

*Haemoproteus* blood parasites in Dark-eyed Juncos captured and sampled at a high-elevation valley in northern Colorado

during 2017-2018. ‘PCR run’ indicates the 3 PCR replicates carried out for each sample. The number of parameters (K), model weights ( $w_i$ ), and deviance are shown for each model and the models are ranked by their AICc differences relative to the best model in the set ( $\Delta\text{AICc}_i$ ). Sigma ( $\sigma$ ) was a random effect included in every model to account for unmodeled heterogeneity.
