# Supplementary material for: Sex and nest type influence avian blood parasite prevalence in a high-elevation bird community
Source: PubMed Central journal article supplement (PMC7938522; doi:10.1186/s13071-021-04612-w), 2021-03-08
Supplement: 13071_2021_4612_MOESM9_ESM.pdf [file 13071_2021_4612_MOESM9_ESM.pdf]

**Additional File 9** Model rankings exploring factors affecting detection probability (p) and prevalence ( $\psi$ ) of *Haemoproteus* parasites in Warbling Vireos.

| <b>Model</b>                                                   | <b>K</b> | <b><math>\Delta</math>AICc</b> | <b><math>w_i</math></b> | <b>Deviance</b> |
|----------------------------------------------------------------|----------|--------------------------------|-------------------------|-----------------|
| $\sigma(\cdot) + p(\cdot) + \psi(\cdot)$                       | 2        | 0.96                           | 0.15                    | 78.29           |
| $\sigma(\cdot) + p(\text{PCR run}) + \psi(\text{BCI})$         | 5        | 1.33                           | 0.13                    | 69.54           |
| $\sigma(\cdot) + p(\cdot) + \psi(\text{BCI})$                  | 3        | 1.54                           | 0.12                    | 76.16           |
| $\sigma(\cdot) + p(\text{PCR run}) + \psi(\text{sex})$         | 5        | 1.63                           | 0.11                    | 69.85           |
| $\sigma(\cdot) + p(\cdot) + \psi(\text{sex})$                  | 3        | 1.90                           | 0.10                    | 76.52           |
| $\sigma(\cdot) + p(\cdot) + \psi(\text{sex+BCI})$              | 4        | 2.79                           | 0.06                    | 74.40           |
| $\sigma(\cdot) + p(\text{PCR run}) + \psi(\text{sex+BCI})$     | 6        | 3.29                           | 0.05                    | 67.65           |
| $\sigma(\cdot) + p(\cdot) + \psi(\text{age})$                  | 4        | 6.48                           | 0.01                    | 78.09           |
| $\sigma(\cdot) + p(\cdot) + \psi(\text{age+BCI})$              | 6        | 6.65                           | 0.01                    | 71.01           |
| $\sigma(\cdot) + p(\cdot) + \psi(\text{age})$                  | 6        | 7.04                           | 0.01                    | 71.40           |
| $\sigma(\cdot) + p(\cdot) + \psi(\text{sex+age})$              | 5        | 8.25                           | 0.00                    | 76.46           |
| $\sigma(\cdot) + p(\text{PCR run}) + \psi(\text{age+BCI})$     | 7        | 8.27                           | 0.00                    | 68.23           |
| $\sigma(\cdot) + p(\cdot) + \psi(\text{sex+age+BCI})$          | 6        | 8.85                           | 0.00                    | 73.21           |
| $\sigma(\cdot) + p(\text{PCR run}) + \psi(\text{sex+age})$     | 7        | 9.82                           | 0.00                    | 69.78           |
| $\sigma(\cdot) + p(\text{PCR run}) + \psi(\text{sex+age+BCI})$ | 8        | 11.69                          | 0.00                    | 66.57           |

Model set and rankings exploring the importance of factors affecting the detection probability (p) and prevalence ( $\psi$ ) of *Haemoproteus* blood parasites in Warbling Vireos captured and sampled at a high-elevation valley in northern Colorado during 2017-2018. ‘PCR run’ indicates the 3 PCR replicates carried out for each sample. The number of parameters (K), model weights ( $w_i$ ), and deviance are shown for each model and the models are ranked by their AICc differences relative to the best model in the set ( $\Delta$ AICc). Sigma ( $\sigma$ ) was a random effect included in every model to account for unmodeled heterogeneity.
