# Supplementary material for: Sex and nest type influence avian blood parasite prevalence in a high-elevation bird community
Source: PubMed Central journal article supplement (PMC7938522; doi:10.1186/s13071-021-04612-w), 2021-03-08
Supplement: 13071_2021_4612_MOESM10_ESM.pdf [file 13071_2021_4612_MOESM10_ESM.pdf]

**Additional File 10** Model rankings exploring factors affecting detection probability ( $p$ ) and prevalence ( $\psi$ ) of *Haemoproteus* parasites in White-crowned Sparrows.

| <b>Model</b>                                                    | <b>K</b> | <b><math>\Delta AICc</math></b> | <b><math>w_i</math></b> | <b>Deviance</b> |
|-----------------------------------------------------------------|----------|---------------------------------|-------------------------|-----------------|
| $\sigma(.) + p(.) + \psi(\text{sex+BCI})$                       | 5        | 0.41                            | 0.10                    | 112.04          |
| $\sigma(.) + p(\text{PCR run}) + \psi(\text{sex+year})$         | 7        | 0.46                            | 0.10                    | 106.79          |
| $\sigma(.) + p(.) + \psi(\text{sex+year})$                      | 5        | 0.86                            | 0.08                    | 112.48          |
| $\sigma(.) + p(\text{PCR run}) + \psi(\text{sex})$              | 6        | 1.17                            | 0.07                    | 110.21          |
| $\sigma(.) + p(\text{PCR run}) + \psi(\text{year})$             | 6        | 1.37                            | 0.06                    | 110.40          |
| $\sigma(.) + p(\text{PCR PCR run}) + \psi(.)$                   | 5        | 1.48                            | 0.06                    | 113.11          |
| $\sigma(.) + p(\text{PCR run}) + \psi(\text{BCI})$              | 6        | 1.51                            | 0.06                    | 110.55          |
| $\sigma(.) + p(.) + \psi(\text{sex})$                           | 4        | 1.74                            | 0.05                    | 115.84          |
| $\sigma(.) + p(.) + \psi(\text{year})$                          | 4        | 1.96                            | 0.05                    | 116.06          |
| $\sigma(.) + p(.) + \psi(\text{BCI})$                           | 4        | 2.18                            | 0.04                    | 116.29          |
| $\sigma(.) + p(.) + \psi(.)$                                    | 3        | 2.30                            | 0.04                    | 118.77          |
| $\sigma(.) + p(\text{PCR run}) + \psi(\text{sex+year+BCI})$     | 8        | 2.80                            | 0.03                    | 106.28          |
| $\sigma(.) + p(.) + \psi(\text{sex+year+BCI})$                  | 6        | 2.95                            | 0.03                    | 111.98          |
| $\sigma(.) + p(.) + \psi(\text{sex+age+BCI})$                   | 7        | 3.82                            | 0.02                    | 110.15          |
| $\sigma(.) + p(\text{PCR run}) + \psi(\text{sex+age+BCI})$      | 9        | 3.92                            | 0.02                    | 104.41          |
| $\sigma(.) + p(\text{PCR run}) + \psi(\text{year+BCI})$         | 7        | 4.03                            | 0.02                    | 110.36          |
| $\sigma(.) + p(.) + \psi(\text{year+BCI})$                      | 5        | 4.39                            | 0.01                    | 116.02          |
| $\sigma(.) + p(.) + \psi(\text{sex+age+year})$                  | 7        | 5.23                            | 0.01                    | 111.55          |
| $\sigma(.) + p(\text{PCR run}) + \psi(\text{sex+age+year+BCI})$ | 9        | 5.34                            | 0.01                    | 105.83          |
| $\sigma(.) + p(\text{PCR run}) + \psi(\text{age})$              | 7        | 5.42                            | 0.01                    | 105.83          |
| $\sigma(.) + p(.) + \psi(\text{age})$                           | 5        | 5.78                            | 0.01                    | 117.40          |
| $\sigma(.) + p(\text{PCR run}) + \psi(\text{sex+age})$          | 8        | 5.87                            | 0.01                    | 109.34          |
| $\sigma(.) + p(.) + \psi(\text{sex+age})$                       | 6        | 5.91                            | 0.01                    | 114.94          |
| $\sigma(.) + p(\text{PCR run}) + \psi(\text{age+BCI})$          | 8        | 6.58                            | 0.00                    | 110.06          |

|                                                                                   |          |             |             |               |
|-----------------------------------------------------------------------------------|----------|-------------|-------------|---------------|
| $\sigma(\cdot) + p(\text{PCR run}) + \psi(\text{age+year})$                       | 8        | 6.69        | 0.00        | 110.17        |
| $\sigma(\cdot) + p(\cdot) + \psi(\text{age+BCI})$                                 | 6        | 6.76        | 0.00        | 115.80        |
| $\sigma(\cdot) + p(\cdot) + \psi(\text{age+year})$                                | 6        | 6.77        | 0.00        | 115.80        |
| $\sigma(\cdot) + p(\cdot) + \psi(\text{sex+age+year+BCI})$                        | 8        | 7.50        | 0.00        | 110.98        |
| $\sigma(\cdot) + p(\text{PCR run}) + \psi(\text{sex+age+year+BCI})$               | 10       | 7.91        | 0.00        | 105.26        |
| $\sigma(\cdot) + p(\cdot) + \psi(\text{age+year+BCI})$                            | 7        | 9.43        | 0.00        | 115.75        |
| <u><math>\sigma(\cdot) + p(\text{PCR run}) + \psi(\text{age+year+BCI})</math></u> | <u>9</u> | <u>9.54</u> | <u>0.00</u> | <u>110.03</u> |

Model set and rankings exploring the importance of factors affecting the detection probability (p) and prevalence ( $\psi$ ) of

*Haemoproteus* blood parasites in White-crowned Sparrows captured and sampled at a high-elevation valley in northern

Colorado during 2017-2018. ‘PCR run’ indicates the 3 PCR replicates carried out for each sample. The number of parameters

(K), model weights ( $w_i$ ), and deviance are shown for each model and the models are ranked by their AICc differences relative

to the best model in the set ( $\Delta\text{AICc}_i$ ). Sigma ( $\sigma$ ) was a random effect included in every model to account for unmodeled

heterogeneity.
