# Supplementary material for: Sex and nest type influence avian blood parasite prevalence in a high-elevation bird community
Source: PubMed Central journal article supplement (PMC7938522; doi:10.1186/s13071-021-04612-w), 2021-03-08
Supplement: 13071_2021_4612_MOESM11_ESM.pdf [file 13071_2021_4612_MOESM11_ESM.pdf]

**Additional File 11** Model rankings exploring factors affecting detection probability ( $p$ ) and prevalence ( $\psi$ ) of *Haemoproteus* parasites in Wilson's Warblers.

| <b>Model</b>                                                    | <b>K</b> | <b><math>\Delta</math>AICc</b> | <b><math>w_i</math></b> | <b>Deviance</b> |
|-----------------------------------------------------------------|----------|--------------------------------|-------------------------|-----------------|
| $\sigma(\cdot) + p(\cdot) + \psi(\text{sex+year})$              | 5        | 0.01                           | 0.19                    | 101.85          |
| $\sigma(\cdot) + p(\cdot) + \psi(\text{sex})$                   | 4        | 0.59                           | 0.15                    | 104.98          |
| $\sigma(\cdot) + p(\cdot) + \psi(\text{year})$                  | 4        | 1.57                           | 0.09                    | 105.97          |
| $\sigma(\cdot) + p(\cdot) + \psi(\text{BCI})$                   | 4        | 1.66                           | 0.08                    | 106.06          |
| $\sigma(\cdot) + p(\cdot) + \psi(\cdot)$                        | 3        | 2.10                           | 0.07                    | 108.92          |
| $\sigma(\cdot) + p(\cdot) + \psi(\text{sex+year+BCI})$          | 6        | 2.69                           | 0.05                    | 101.84          |
| $\sigma(\cdot) + p(\cdot) + \psi(\text{year+BCI})$              | 5        | 4.09                           | 0.03                    | 105.93          |
| $\sigma(\cdot) + p(\text{PCR run}) + \psi(\text{sex+BCI})$      | 7        | 4.89                           | 0.02                    | 101.20          |
| $\sigma(\cdot) + p(\text{PCR run}) + \psi(\text{sex+year})$     | 7        | 4.90                           | 0.02                    | 101.21          |
| $\sigma(\cdot) + p(\text{PCR run}) + \psi(\text{sex})$          | 6        | 5.19                           | 0.01                    | 104.35          |
| $\sigma(\cdot) + p(\cdot) + \psi(\text{sex+age+BCI})$           | 7        | 5.35                           | 0.01                    | 101.66          |
| $\sigma(\cdot) + p(\cdot) + \psi(\text{sex+age+year})$          | 7        | 5.38                           | 0.01                    | 101.69          |
| $\sigma(\cdot) + p(\cdot) + \psi(\text{sex+age})$               | 6        | 5.65                           | 0.01                    | 104.80          |
| $\sigma(\cdot) + p(\text{PCR run}) + \psi(\text{year})$         | 6        | 6.18                           | 0.01                    | 105.33          |
| $\sigma(\cdot) + p(\text{PCR run}) + \psi(\text{BCI})$          | 6        | 6.27                           | 0.01                    | 105.42          |
| $\sigma(\cdot) + p(\text{PCR run}) + \psi(\cdot)$               | 5        | 6.44                           | 0.01                    | 108.28          |
| $\sigma(\cdot) + p(\cdot) + \psi(\text{age+year})$              | 6        | 6.77                           | 0.01                    | 105.92          |
| $\sigma(\cdot) + p(\cdot) + \psi(\text{age+BCI})$               | 6        | 6.85                           | 0.01                    | 106.01          |
| $\sigma(\cdot) + p(\cdot) + \psi(\text{age})$                   | 5        | 6.94                           | 0.01                    | 108.78          |
| $\sigma(\cdot) + p(\text{PCR run}) + \psi(\text{sex+year+BCI})$ | 8        | 7.89                           | 0.00                    | 101.19          |
| $\sigma(\cdot) + p(\cdot) + \psi(\text{sex+age+year+BCI})$      | 8        | 8.35                           | 0.00                    | 101.66          |
| $\sigma(\cdot) + p(\text{PCR run}) + \psi(\text{year+BCI})$     | 7        | 8.98                           | 0.00                    | 105.29          |
| $\sigma(\cdot) + p(\cdot) + \psi(\text{age+year+BCI})$          | 7        | 9.59                           | 0.00                    | 105.90          |
| $\sigma(\cdot) + p(\text{PCR run}) + \psi(\text{sex+age})$      | 7        | 10.85                          | 0.00                    | 104.16          |

|                                                                                   |          |              |             |               |
|-----------------------------------------------------------------------------------|----------|--------------|-------------|---------------|
| $\sigma(\cdot) + p(\text{PCR run}) + \psi(\text{sex+age+BCI})$                    | 9        | 10.88        | 0.00        | 101.01        |
| $\sigma(\cdot) + p(\text{PCR run}) + \psi(\text{sex+age+year})$                   | 9        | 10.92        | 0.00        | 101.05        |
| $\sigma(\cdot) + p(\text{PCR run}) + \psi(\text{age})$                            | 7        | 11.83        | 0.00        | 108.14        |
| $\sigma(\cdot) + p(\text{PCR run}) + \psi(\text{age+year})$                       | 8        | 11.97        | 0.00        | 105.28        |
| $\sigma(\cdot) + p(\text{PCR run}) + \psi(\text{age+BCI})$                        | 8        | 12.06        | 0.00        | 105.37        |
| $\sigma(\cdot) + p(\text{PCR run}) + \psi(\text{sex+age+year+BCI})$               | 10       | 14.26        | 0.00        | 101.01        |
| <u><math>\sigma(\cdot) + p(\text{PCR run}) + \psi(\text{age+year+BCI})</math></u> | <u>9</u> | <u>15.13</u> | <u>0.00</u> | <u>105.26</u> |

Model set and rankings exploring the importance of factors affecting the detection probability ( $p$ ) and prevalence ( $\psi$ ) of *Haemoproteus* blood parasites in Wilson's Warblers captured and sampled at a high-elevation valley in northern Colorado during 2017-2018. 'PCR run' indicates the 3 PCR replicates carried out for each sample. The number of parameters ( $K$ ), model weights ( $w_i$ ), and deviance are shown for each model and the models are ranked by their AICc differences relative to the best model in the set ( $\Delta\text{AICc}_i$ ). Sigma ( $\sigma$ ) was a random effect included in every model to account for unmodeled heterogeneity.
